# Supplementary material
Source: Springer Nature journal article supplement (https://www.springermedizin.de/resource/supplementary/12913_2014_3530_MOESM1_ESM.pdf/9533126)

## Gender

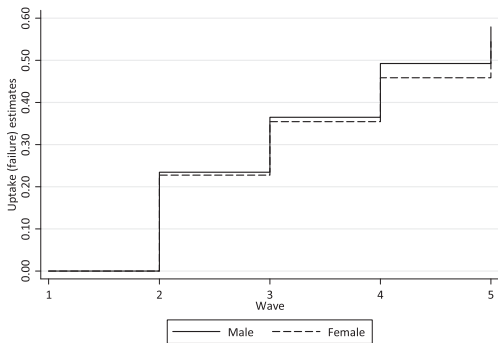

## Ethnicity

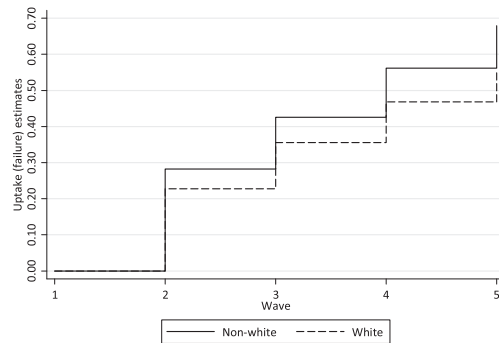

## Age

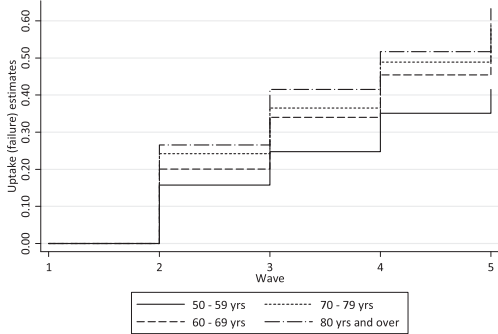

## Wealth

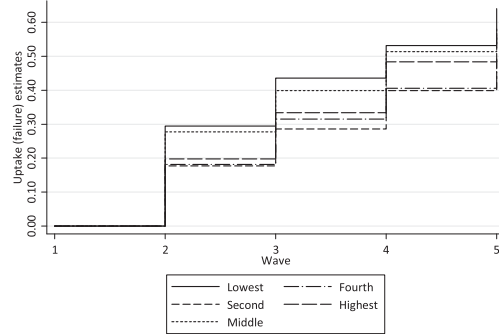

## Private

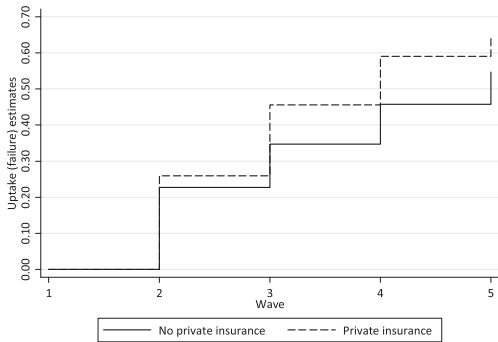

## IMD

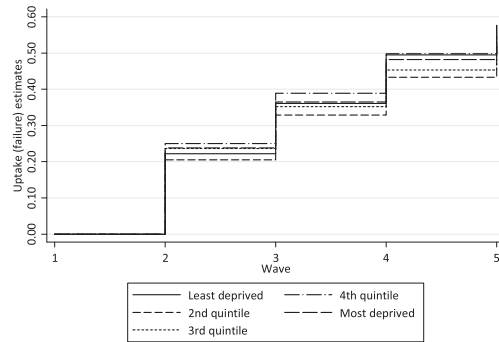

## Vision

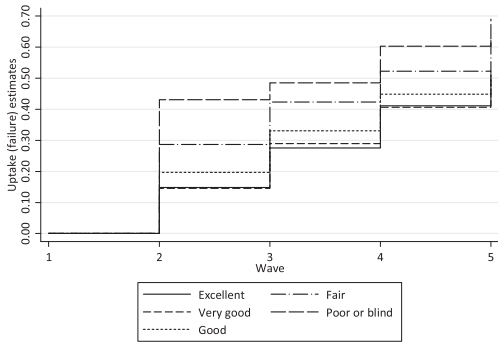

## Recommendation

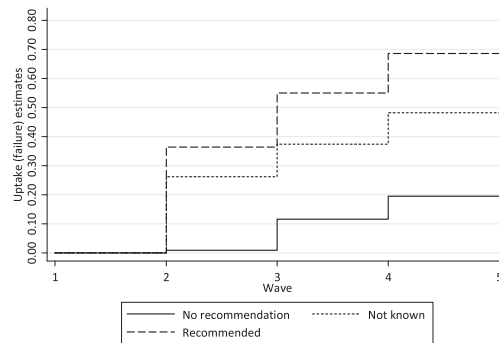

Supplement: MOESM1 [file 9533126]
